# Supplementary material
Source: publisher figshare collection journal article supplement (https://gsapubs.figshare.com/ndownloader/files/23347334)
Supplement: Supplementary file 1 [file 23347334]

## Sheet: Tianshui silts
BayesMix was run for 15000 iterations (burn-in: 5000; post-burn-in: 10000; thinning: 1).
YW 1 (randomly selected)
No of components = 11; Log Likelihood = 191.012159; Log Posterior = 156.697909
Component 1: Mode = 254.322 Mu = 254.097 Sigma = 1.70727 Nu = 0.670104 Eta = 0.408224 Pi = 0.178011
Component 2: Mode = 279.949 Mu = 279.904 Sigma = 1.15344 Nu = 0.211327 Eta = 0.119562 Pi = 0.059728
Component 3: Mode = 464.724 Mu = 496.263 Sigma = 17.5495 Nu = 0.921125 Eta = 5.05211 Pi = 0.258886
Component 4: Mode = 713.695 Mu = 713.882 Sigma = 2.70397 Nu = 2.36125 Eta = 2.54513 Pi = 0.067238
Component 5: Mode = 899.741 Mu = 899.741 Sigma = 1.73735 Nu = 0.09225 Eta = 0.09225 Pi = 0.118637
Component 6: Mode = 1143.72 Mu = 1143.72 Sigma = 4.53458 Nu = 0.126624 Eta = 0.126624 Pi = 0.076725
Component 7: Mode = 1516.32 Mu = 1516.29 Sigma = 1.03922 Nu = 0.183965 Eta = 0.110127 Pi = 0.050759
Component 8: Mode = 1816.79 Mu = 1817.64 Sigma = 1.67516 Nu = 1.46966 Eta = 2.71713 Pi = 0.063087
Component 9: Mode = 2041.02 Mu = 2040.86 Sigma = 1.9418 Nu = 0.77642 Eta = 0.603247 Pi = 0.065461
Component 10: Mode = 2446.82 Mu = 2446.82 Sigma = 4.89535 Nu = 0.333188 Eta = 0.333188 Pi = 0.0195
Component 11: Mode = 2629.11 Mu = 2629.09 Sigma = 0.70286 Nu = 0.182539 Eta = 0.140535 Pi = 0.041969
Data error scale factor = 1.899751
YW 6 (randomly selected)
No of components = 13; Log Likelihood = 180.261336; Log Posterior = 142.938631
Component 1: Mode = 242.75 Mu = 242.696 Sigma = 5.00623 Nu = 0.236623 Eta = 0.213288 Pi = 0.127421
Component 2: Mode = 286.564 Mu = 281.014 Sigma = 12.9369 Nu = 1.60771 Eta = 0.707938 Pi = 0.135496
Component 3: Mode = 293.016 Mu = 290.77 Sigma = 12.0681 Nu = 0.675403 Eta = 0.309697 Pi = 0.011297
Component 4: Mode = 457.377 Mu = 457.377 Sigma = 3.69123 Nu = 0.255541 Eta = 0.255541 Pi = 0.283302
Component 5: Mode = 517.986 Mu = 517.986 Sigma = 5.72124 Nu = 0.263058 Eta = 0.263058 Pi = 0.015457
Component 6: Mode = 898.896 Mu = 1018.57 Sigma = 54.1495 Nu = 1.14408 Eta = 6.56976 Pi = 0.183233
Component 7: Mode = 1156.18 Mu = 1156.18 Sigma = 21.3768 Nu = 0.79198 Eta = 0.79198 Pi = 0.012204
Component 8: Mode = 1464.87 Mu = 1464.87 Sigma = 7.52734 Nu = 0.311815 Eta = 0.311815 Pi = 0.042374
Component 9: Mode = 1697.82 Mu = 1674.26 Sigma = 41.4316 Nu = 1.68779 Eta = 0.538707 Pi = 0.087104
Component 10: Mode = 1844.4 Mu = 1844.36 Sigma = 3.15431 Nu = 1.12454 Eta = 1.09576 Pi = 0.021711
Component 11: Mode = 2261.38 Mu = 2283.57 Sigma = 5.82727 Nu = 0.233044 Eta = 6.8767 Pi = 0.031792
Component 12: Mode = 2548.02 Mu = 2548.02 Sigma = 4.41649 Nu = 0.255367 Eta = 0.255367 Pi = 0.020631
Component 13: Mode = 2788.04 Mu = 2794.46 Sigma = 5.70701 Nu = 0.155553 Eta = 2.1122 Pi = 0.027978
Data error scale factor = 1.864133
YW 6 (euhedral)
No of components = 6; Log Likelihood = 180.482505; Log Posterior = 158.792762
Component 1: Mode = 236.402 Mu = 236.402 Sigma = 14.2356 Nu = 0.439282 Eta = 0.439282 Pi = 0.431169
Component 2: Mode = 282.645 Mu = 282.645 Sigma = 5.6987 Nu = 0.767955 Eta = 0.767955 Pi = 0.073204
Component 3: Mode = 398.254 Mu = 398.254 Sigma = 5.32153 Nu = 0.890615 Eta = 0.890615 Pi = 0.041488
Component 4: Mode = 433.742 Mu = 433.742 Sigma = 3.66861 Nu = 0.621277 Eta = 0.621277 Pi = 0.348388
Component 5: Mode = 1086.39 Mu = 1085.9 Sigma = 16.0032 Nu = 0.764172 Eta = 0.701032 Pi = 0.077072
Component 6: Mode = 2307.99 Mu = 2307.45 Sigma = 2.79781 Nu = 0.797804 Eta = 0.412635 Pi = 0.028679
Data error scale factor = 1.854379
QA 3 (randomly selected)
No of components = 10; Log Likelihood = 95.758783; Log Posterior = 67.731702
Component 1: Mode = 241.371 Mu = 240.964 Sigma = 6.09649 Nu = 0.685519 Eta = 0.551527 Pi = 0.145135
Component 2: Mode = 319.101 Mu = 319.101 Sigma = 9.90427 Nu = 1.37327 Eta = 1.37327 Pi = 0.111062
Component 3: Mode = 413.982 Mu = 405.249 Sigma = 38.6556 Nu = 0.871888 Eta = 0.424906 Pi = 0.280688
Component 4: Mode = 819.552 Mu = 816.719 Sigma = 28.9475 Nu = 0.512081 Eta = 0.316595 Pi = 0.158346
Component 5: Mode = 1237.16 Mu = 1236.91 Sigma = 4.74937 Nu = 0.35772 Eta = 0.251958 Pi = 0.034566
Component 6: Mode = 1476.43 Mu = 1474.76 Sigma = 19.2655 Nu = 0.614117 Eta = 0.441525 Pi = 0.044681
Component 7: Mode = 1933.37 Mu = 2000 Sigma = 12.9166 Nu = 0.419534 Eta = 10.3499 Pi = 0.128719
Component 8: Mode = 2154.68 Mu = 2154.68 Sigma = 4.74149 Nu = 0.801143 Eta = 0.801143 Pi = 0.050009
Component 9: Mode = 2454.3 Mu = 2454.12 Sigma = 5.52747 Nu = 0.33433 Eta = 0.267543 Pi = 0.026907
Component 10: Mode = 3032.69 Mu = 3045.47 Sigma = 4.09766 Nu = 0.17855 Eta = 5.46061 Pi = 0.019887
Data error scale factor = 1.962838
QA 5 (randomly selected)
No of components = 10; Log Likelihood = 118.554187; Log Posterior = 91.878520
Component 1: Mode = 232.454 Mu = 232.218 Sigma = 4.48742 Nu = 0.930597 Eta = 0.821166 Pi = 0.136192
Component 2: Mode = 287.366 Mu = 287.092 Sigma = 2.93423 Nu = 0.630728 Eta = 0.444523 Pi = 0.143992
Component 3: Mode = 376.749 Mu = 376.749 Sigma = 42.1352 Nu = 0.711092 Eta = 0.711092 Pi = 0.083835
Component 4: Mode = 418.238 Mu = 418.238 Sigma = 13.8544 Nu = 0.535807 Eta = 0.535807 Pi = 0.203655
Component 5: Mode = 575.16 Mu = 573.257 Sigma = 26.1719 Nu = 0.965754 Eta = 0.814453 Pi = 0.043525
Component 6: Mode = 916.319 Mu = 916.319 Sigma = 9.75273 Nu = 0.266684 Eta = 0.266684 Pi = 0.205767
Component 7: Mode = 1753.66 Mu = 1753.66 Sigma = 25.5645 Nu = 0.289492 Eta = 0.289492 Pi = 0.013123
Component 8: Mode = 1871.58 Mu = 1962.5 Sigma = 73.7905 Nu = 0.906541 Eta = 3.69706 Pi = 0.068375
Component 9: Mode = 1993.44 Mu = 1993.44 Sigma = 44.9169 Nu = 0.316225 Eta = 0.316225 Pi = 0.021383
Component 10: Mode = 2459.79 Mu = 2459.66 Sigma = 6.09316 Nu = 0.356542 Eta = 0.314403 Pi = 0.080153
Data error scale factor = 1.783180
QA 5 (euhedral)
No of components = 5; Log Likelihood = 97.117667; Log Posterior = 80.876432
Component 1: Mode = 237.852 Mu = 237.852 Sigma = 2.31008 Nu = 0.893875 Eta = 0.893875 Pi = 0.318981
Component 2: Mode = 310.792 Mu = 310.778 Sigma = 5.19107 Nu = 0.098274 Eta = 0.090728 Pi = 0.117312
Component 3: Mode = 423.665 Mu = 423.361 Sigma = 4.82011 Nu = 0.399963 Eta = 0.271483 Pi = 0.434474
Component 4: Mode = 540.036 Mu = 540.036 Sigma = 7.50016 Nu = 0.603145 Eta = 0.603145 Pi = 0.041299
Component 5: Mode = 760.926 Mu = 765.489 Sigma = 4.06847 Nu = 0.872501 Eta = 3.38281 Pi = 0.087935
Data error scale factor = 1.788892
WS 2 (randomly selected)
No of components = 11; Log Likelihood = 184.929425; Log Posterior = 149.633183
Component 1: Mode = 245.427 Mu = 245.427 Sigma = 8.87616 Nu = 1.01361 Eta = 1.01361 Pi = 0.25833
Component 2: Mode = 274.44 Mu = 272.121 Sigma = 5.41216 Nu = 0.946713 Eta = 0.152792 Pi = 0.118917
Component 3: Mode = 437.834 Mu = 437.834 Sigma = 3.41309 Nu = 0.785008 Eta = 0.785008 Pi = 0.271102
Component 4: Mode = 823.044 Mu = 838.447 Sigma = 19.8275 Nu = 0.639418 Eta = 2.25754 Pi = 0.095884
Component 5: Mode = 906.822 Mu = 906.822 Sigma = 13.624 Nu = 0.681041 Eta = 0.681041 Pi = 0.06525
Component 6: Mode = 1187.31 Mu = 1182.52 Sigma = 9.48385 Nu = 2.00983 Eta = 0.899582 Pi = 0.064208
Component 7: Mode = 1530.97 Mu = 1530.97 Sigma = 6.64093 Nu = 0.493625 Eta = 0.493625 Pi = 0.021904
Component 8: Mode = 1771.84 Mu = 1771.35 Sigma = 26.1016 Nu = 0.377672 Eta = 0.339308 Pi = 0.026248
Component 9: Mode = 2263.37 Mu = 2297.15 Sigma = 9.05685 Nu = 0.338382 Eta = 7.24057 Pi = 0.04667
Component 10: Mode = 2675.11 Mu = 2711.49 Sigma = 9.95264 Nu = 0.674783 Eta = 8.5216 Pi = 0.027983
Component 11: Mode = 3189.9 Mu = 3189.9 Sigma = 14.7935 Nu = 0.362256 Eta = 0.362256 Pi = 0.003503
Data error scale factor = 1.960095
WS 2 (euhedral)
No of components = 5; Log Likelihood = 97.117667; Log Posterior = 80.876432
Component 1: Mode = 237.852 Mu = 237.852 Sigma = 2.31008 Nu = 0.893875 Eta = 0.893875 Pi = 0.318981
Component 2: Mode = 310.792 Mu = 310.778 Sigma = 5.19107 Nu = 0.098274 Eta = 0.090728 Pi = 0.117312
Component 3: Mode = 423.665 Mu = 423.361 Sigma = 4.82011 Nu = 0.399963 Eta = 0.271483 Pi = 0.434474
Component 4: Mode = 540.036 Mu = 540.036 Sigma = 7.50016 Nu = 0.603145 Eta = 0.603145 Pi = 0.041299
Component 5: Mode = 760.926 Mu = 765.489 Sigma = 4.06847 Nu = 0.872501 Eta = 3.38281 Pi = 0.087935
Data error scale factor = 1.788892
WS 7 (randomly selected)
No of components = 14; Log Likelihood = 188.039349; Log Posterior = 161.879087
Component 1: Mode = 233.51 Mu = 229.802 Sigma = 7.50681 Nu = 1.24918 Eta = 0.307926 Pi = 0.160205
Component 2: Mode = 282.4 Mu = 279.979 Sigma = 17.2096 Nu = 0.488976 Eta = 0.206918 Pi = 0.063126
Component 3: Mode = 343.339 Mu = 343.445 Sigma = 3.85868 Nu = 0.428862 Eta = 0.48378 Pi = 0.022001
Component 4: Mode = 441.59 Mu = 441.59 Sigma = 2.62011 Nu = 0.586984 Eta = 0.586984 Pi = 0.292572
Component 5: Mode = 820.292 Mu = 820.292 Sigma = 1.56368 Nu = 0.740642 Eta = 0.740642 Pi = 0.037083
Component 6: Mode = 929.709 Mu = 929.709 Sigma = 5.174 Nu = 0.15948 Eta = 0.15948 Pi = 0.156738
Component 7: Mode = 1255.23 Mu = 1255.23 Sigma = 8.67156 Nu = 0.193905 Eta = 0.193905 Pi = 0.045652
Component 8: Mode = 1409.91 Mu = 1409.63 Sigma = 10.9216 Nu = 0.169051 Eta = 0.107871 Pi = 0.032272
Component 9: Mode = 1625.59 Mu = 1625.59 Sigma = 5.30292 Nu = 0.144353 Eta = 0.144353 Pi = 0.052145
Component 10: Mode = 1858.55 Mu = 1866.09 Sigma = 14.011 Nu = 1.04501 Eta = 2.26745 Pi = 0.029181
Component 11: Mode = 1943 Mu = 1943 Sigma = 18.6155 Nu = 0.384179 Eta = 0.384179 Pi = 0.021628
Component 12: Mode = 2183.35 Mu = 2183.12 Sigma = 13.2369 Nu = 0.147661 Eta = 0.102728 Pi = 0.004494
Component 13: Mode = 2499.25 Mu = 2499.25 Sigma = 32.4656 Nu = 0.244195 Eta = 0.244195 Pi = 0.080813
Component 14: Mode = 2877.86 Mu = 2893.13 Sigma = 7.07914 Nu = 0.257128 Eta = 4.11259 Pi = 0.002089
Data error scale factor = 1.906011
WS 9 (randomly selected)
No of components = 14; Log Likelihood = 128.970523; Log Posterior = 103.095969
Component 1: Mode = 33.9099 Mu = 31.5199 Sigma = 17.7998 Nu = 0.77753 Eta = 0.508732 Pi = 0.032282
Component 2: Mode = 246.977 Mu = 246.977 Sigma = 2.84052 Nu = 0.765196 Eta = 0.765196 Pi = 0.103374
Component 3: Mode = 294.908 Mu = 294.908 Sigma = 5.72828 Nu = 0.495543 Eta = 0.495543 Pi = 0.129627
Component 4: Mode = 431.93 Mu = 431.93 Sigma = 15.6218 Nu = 1.16075 Eta = 1.16075 Pi = 0.27987
Component 5: Mode = 471.539 Mu = 468.774 Sigma = 12.088 Nu = 0.64058 Eta = 0.194988 Pi = 0.029903
Component 6: Mode = 578.928 Mu = 578.471 Sigma = 4.72465 Nu = 0.333195 Eta = 0.127345 Pi = 0.010165
Component 7: Mode = 854.341 Mu = 854.341 Sigma = 14.3016 Nu = 0.317586 Eta = 0.317586 Pi = 0.113035
Component 8: Mode = 1104.96 Mu = 1126.57 Sigma = 25.7219 Nu = 0.377354 Eta = 1.99106 Pi = 0.035576
Component 9: Mode = 1165.9 Mu = 1165.9 Sigma = 25.303 Nu = 0.630111 Eta = 0.630111 Pi = 0.089126
Component 10: Mode = 1357.95 Mu = 1357.95 Sigma = 8.82532 Nu = 0.206669 Eta = 0.206669 Pi = 0.015774
Component 11: Mode = 1496.94 Mu = 1503.73 Sigma = 7.21818 Nu = 0.3615 Eta = 2.1544 Pi = 0.016106
Component 12: Mode = 1877.68 Mu = 1877.68 Sigma = 17.3092 Nu = 0.239032 Eta = 0.239032 Pi = 0.051363
Component 13: Mode = 2039.86 Mu = 2039.86 Sigma = 16.4685 Nu = 0.551362 Eta = 0.551362 Pi = 0.045474
Component 14: Mode = 2504.61 Mu = 2502.24 Sigma = 38.0604 Nu = 0.393584 Eta = 0.266816 Pi = 0.048326
Data error scale factor = 1.953249
WS 21 (randomly selected)
No of components = 11; Log Likelihood = 150.946917; Log Posterior = 116.948346
Component 1: Mode = 20.7655 Mu = 20.7655 Sigma = 3.68618 Nu = 0.294697 Eta = 0.294697 Pi = 0.023159
Component 2: Mode = 249.66 Mu = 249.231 Sigma = 6.04304 Nu = 0.420815 Eta = 0.277003 Pi = 0.147805
Component 3: Mode = 324.324 Mu = 324.324 Sigma = 17.6935 Nu = 0.547943 Eta = 0.547943 Pi = 0.107882
Component 4: Mode = 464.98 Mu = 473.87 Sigma = 5.83624 Nu = 0.574087 Eta = 3.70409 Pi = 0.224989
Component 5: Mode = 573.42 Mu = 577.376 Sigma = 2.95715 Nu = 0.301274 Eta = 2.77272 Pi = 0.083864
Component 6: Mode = 813.994 Mu = 813.994 Sigma = 3.42221 Nu = 0.195292 Eta = 0.195292 Pi = 0.063534
Component 7: Mode = 932.254 Mu = 932.254 Sigma = 4.28298 Nu = 0.250044 Eta = 0.250044 Pi = 0.091693
Component 8: Mode = 1182.75 Mu = 1186.09 Sigma = 12.5346 Nu = 0.396281 Eta = 0.921136 Pi = 0.038378
Component 9: Mode = 1692.24 Mu = 1692.55 Sigma = 11.9311 Nu = 0.189633 Eta = 0.246958 Pi = 0.031945
Component 10: Mode = 1933.4 Mu = 2064.61 Sigma = 51.966 Nu = 0.517241 Eta = 5.60311 Pi = 0.08551
Component 11: Mode = 2597.99 Mu = 2708.62 Sigma = 61.4978 Nu = 0.286586 Eta = 3.56473 Pi = 0.101242
Data error scale factor = 1.932890
YD 6 (randomly selected)
No of components = 5; Log Likelihood = 398.474873; Log Posterior = 368.693391
Component 1: Mode = 263.075 Mu = 259.695 Sigma = 10.2945 Nu = 0.915667 Eta = 0.284072 Pi = 0.091508
Component 2: Mode = 472.458 Mu = 472.458 Sigma = 2.79559 Nu = 2.24717 Eta = 2.24717 Pi = 0.764614
Component 3: Mode = 974.86 Mu = 974.86 Sigma = 6.34218 Nu = 0.311107 Eta = 0.311107 Pi = 0.06929
Component 4: Mode = 1913.96 Mu = 1916 Sigma = 0.959997 Nu = 0.940786 Eta = 5.86556 Pi = 0.036815
Component 5: Mode = 2619.58 Mu = 2619.58 Sigma = 8.38425 Nu = 0.545365 Eta = 0.545365 Pi = 0.037773
Data error scale factor = 1.751559

## Sheet: loess & Red Clay
loess & Red Clay samples of this study
LC-L15 (randomly selected)
No of components = 8, Log Likelihood = 63.084915, Log Posterior = 49.170365
Component 1: : Mode = 256.604 Mu = 252.666 Sigma = 47.4722 Nu = 0.53 Eta = 0.364442 Pi = 0.295547
Component 2: : Mode = 475.184 Mu = 475.184 Sigma = 28.6155 Nu = 0.51685 Eta = 0.51685 Pi = 0.246508
Component 3: : Mode = 696.806 Mu = 672.6 Sigma = 97.919 Nu = 0.768435 Eta = 0.28755 Pi = 0.014836
Component 4: : Mode = 943.691 Mu = 942.432 Sigma = 56.5899 Nu = 0.401127 Eta = 0.356204 Pi = 0.062007
Component 5: : Mode = 1412.83 Mu = 1412.83 Sigma = 176.106 Nu = 0.554798 Eta = 0.554798 Pi = 0.156637
Component 6: : Mode = 1854.61 Mu = 1854.61 Sigma = 41.5888 Nu = 0.43945 Eta = 0.43945 Pi = 0.136096
Component 7: : Mode = 2163.01 Mu = 2162.33 Sigma = 123.848 Nu = 0.039115 Eta = 0.014093 Pi = 0.019553
Component 8: : Mode = 2585.56 Mu = 2585.56 Sigma = 87.4809 Nu = 0.59008 Eta = 0.59008 Pi = 0.068816
Data error scale factor = 1.862513
LC-L15 (euhedral)
No of components = 4, Log Likelihood = 166.570306, Log Posterior = 145.611232
Component 1: : Mode = 291.458 Mu = 310.66 Sigma = 13.3999 Nu = 0.8695 Eta = 4.09616 Pi = 0.482906
Component 2: : Mode = 434.44 Mu = 434.44 Sigma = 4.11621 Nu = 0.629992 Eta = 0.629992 Pi = 0.348303
Component 3: : Mode = 777.041 Mu = 777.041 Sigma = 11.4847 Nu = 0.609527 Eta = 0.609527 Pi = 0.088224
Component 4: : Mode = 1893.23 Mu = 1918.67 Sigma = 10.0624 Nu = 0.367702 Eta = 5.13339 Pi = 0.080568
Data error scale factor = 1.924363
LC-RC (randomly selected)
No of components = 10, Log Likelihood = 68.843072, Log Posterior = 38.679978
Component 1: : Mode = 284.644 Mu = 284.644 Sigma = 7.26954 Nu = 0.274857 Eta = 0.274857 Pi = 0.163828
Component 2: : Mode = 444.159 Mu = 443.603 Sigma = 12.4628 Nu = 0.931533 Eta = 0.838711 Pi = 0.251365
Component 3: : Mode = 531.447 Mu = 531.447 Sigma = 34.1685 Nu = 0.513506 Eta = 0.513506 Pi = 0.039488
Component 4: : Mode = 873.046 Mu = 928.856 Sigma = 126.048 Nu = 0.903646 Eta = 1.87355 Pi = 0.141358
Component 5: : Mode = 1363.47 Mu = 1377.28 Sigma = 15.4471 Nu = 0.252486 Eta = 1.89128 Pi = 0.071662
Component 6: : Mode = 1478.6 Mu = 1477.78 Sigma = 6.37778 Nu = 0.730463 Eta = 0.474179 Pi = 0.070065
Component 7: : Mode = 1899.05 Mu = 1899.05 Sigma = 24.1426 Nu = 0.471339 Eta = 0.471339 Pi = 0.075876
Component 8: : Mode = 1974.26 Mu = 1972.61 Sigma = 80.9765 Nu = 0.646658 Eta = 0.605428 Pi = 0.062656
Component 9: : Mode = 2540.15 Mu = 2566.09 Sigma = 14.1451 Nu = 0.61472 Eta = 4.44224 Pi = 0.09279
Component 10: : Mode = 2778.92 Mu = 2778.92 Sigma = 26.3189 Nu = 0.697718 Eta = 0.697718 Pi = 0.030913
Data error scale factor = 1.935791
LC-RC (euhedral)
No of components = 4; Log Likelihood = 166.570306; Log Posterior = 145.611232
Component 1: Mode = 291.458 Mu = 310.66 Sigma = 13.3999 Nu = 0.8695 Eta = 4.09616 Pi = 0.482906
Component 2: Mode = 434.44 Mu = 434.44 Sigma = 4.11621 Nu = 0.629992 Eta = 0.629992 Pi = 0.348303
Component 3: Mode = 777.041 Mu = 777.041 Sigma = 11.4847 Nu = 0.609527 Eta = 0.609527 Pi = 0.088224
Component 4: Mode = 1893.23 Mu = 1918.67 Sigma = 10.0624 Nu = 0.367702 Eta = 5.13339 Pi = 0.080568
Data error scale factor = 1.924363
XF-L5 (randomly selected)
No of components = 9; Log Likelihood = 106.358615; Log Posterior = 74.869950
Component 1: Mode = 294.645 Mu = 300.952 Sigma = 8.52042 Nu = 0.860776 Eta = 2.49219 Pi = 0.146
Component 2: Mode = 441.199 Mu = 441.199 Sigma = 14.0649 Nu = 1.01335 Eta = 1.01335 Pi = 0.302117
Component 3: Mode = 756.166 Mu = 756.166 Sigma = 2.01081 Nu = 0.352266 Eta = 0.352266 Pi = 0.140295
Component 4: Mode = 986.795 Mu = 986.795 Sigma = 3.10152 Nu = 0.306669 Eta = 0.306669 Pi = 0.14525
Component 5: Mode = 1603.96 Mu = 1526.54 Sigma = 235.585 Nu = 2.04985 Eta = 1.28233 Pi = 0.162525
Component 6: Mode = 1884.16 Mu = 1884.16 Sigma = 3.63842 Nu = 0.730419 Eta = 0.730419 Pi = 0.000153
Component 7: Mode = 2092.31 Mu = 2092.31 Sigma = 2.92372 Nu = 0.252161 Eta = 0.252161 Pi = 0.045978
Component 8: Mode = 2503.67 Mu = 2503.67 Sigma = 4.309 Nu = 0.723291 Eta = 0.723291 Pi = 0.0516
Component 9: Mode = 2616.6 Mu = 2616.45 Sigma = 3.25825 Nu = 0.162771 Eta = 0.036819 Pi = 0.006082
Data error scale factor = 1.494810
XF-RCM (randomly selected)
No of components = 11; Log Likelihood = 153.017690; Log Posterior = 111.255890
Component 1: Mode = 138.79 Mu = 138.623 Sigma = 2.54481 Nu = 0.252784 Eta = 0.10455 Pi = 0.022706
Component 2: Mode = 275.94 Mu = 276.535 Sigma = 2.20398 Nu = 1.02555 Eta = 1.62311 Pi = 0.160444
Component 3: Mode = 433.6 Mu = 433.485 Sigma = 3.31613 Nu = 0.339247 Eta = 0.267553 Pi = 0.263908
Component 4: Mode = 499.207 Mu = 509.475 Sigma = 2.1371 Nu = 1.15701 Eta = 13.2406 Pi = 0.109049
Component 5: Mode = 789.757 Mu = 789.757 Sigma = 8.51748 Nu = 0.218858 Eta = 0.218858 Pi = 0.12815
Component 6: Mode = 915.294 Mu = 915.294 Sigma = 2.1759 Nu = 0.384015 Eta = 0.384015 Pi = 0.095319
Component 7: Mode = 1563.15 Mu = 1700.51 Sigma = 183.702 Nu = 1.23734 Eta = 3.03004 Pi = 0.141319
Component 8: Mode = 2228.32 Mu = 2228.32 Sigma = 4.3659 Nu = 0.423069 Eta = 0.423069 Pi = 0.016031
Component 9: Mode = 2528.34 Mu = 2528.34 Sigma = 0.650647 Nu = 1.4693 Eta = 1.4693 Pi = 0.024786
Component 10: Mode = 2574.07 Mu = 2574.07 Sigma = 1.12874 Nu = 0.771768 Eta = 0.771768 Pi = 0.029513
Component 11: Mode = 3118.83 Mu = 3118.49 Sigma = 1.06772 Nu = 0.747695 Eta = 0.136989 Pi = 0.008775
Data error scale factor = 1.998554
XF-RCB (randomly selected)
No of components = 9; Log Likelihood = 85.090766; Log Posterior = 55.604549
Component 1: Mode = 290.564 Mu = 289.724 Sigma = 11.7782 Nu = 0.508565 Eta = 0.366015 Pi = 0.187649
Component 2: Mode = 443.251 Mu = 443.251 Sigma = 13.8595 Nu = 0.382382 Eta = 0.382382 Pi = 0.28409
Component 3: Mode = 764.814 Mu = 764.814 Sigma = 14.1838 Nu = 0.843851 Eta = 0.843851 Pi = 0.100365
Component 4: Mode = 939.311 Mu = 939.311 Sigma = 15.2826 Nu = 0.452377 Eta = 0.452377 Pi = 0.091621
Component 5: Mode = 1101.15 Mu = 1101.15 Sigma = 12.1866 Nu = 2.80215 Eta = 2.80215 Pi = 0.017917
Component 6: Mode = 1480.28 Mu = 1480.19 Sigma = 11.97 Nu = 0.346049 Eta = 0.330888 Pi = 0.022985
Component 7: Mode = 1811.41 Mu = 1811.41 Sigma = 9.33833 Nu = 0.265046 Eta = 0.265046 Pi = 0.144239
Component 8: Mode = 2275.87 Mu = 2444.37 Sigma = 42.491 Nu = 0.506417 Eta = 8.46019 Pi = 0.060294
Component 9: Mode = 2544.77 Mu = 2575.64 Sigma = 18.0532 Nu = 1.25332 Eta = 5.52339 Pi = 0.090841
Data error scale factor = 1.919357
XF-RCB (euhedral)
No of components = 8; Log Likelihood = 140.256228; Log Posterior = 115.874046
Component 1: Mode = 130.137 Mu = 130.137 Sigma = 11.6001 Nu = 0.374051 Eta = 0.374051 Pi = 0.151174
Component 2: Mode = 224.846 Mu = 225.773 Sigma = 5.64095 Nu = 0.718855 Eta = 1.05888 Pi = 0.103344
Component 3: Mode = 282.604 Mu = 282.589 Sigma = 1.03972 Nu = 0.445002 Eta = 0.416197 Pi = 0.200736
Component 4: Mode = 393.358 Mu = 393.358 Sigma = 4.50828 Nu = 0.630299 Eta = 0.630299 Pi = 0.08871
Component 5: Mode = 445.788 Mu = 445.209 Sigma = 2.15905 Nu = 0.783458 Eta = 0.265092 Pi = 0.306116
Component 6: Mode = 550.485 Mu = 548.468 Sigma = 6.82616 Nu = 1.20607 Eta = 0.6034 Pi = 0.064249
Component 7: Mode = 825.113 Mu = 825.023 Sigma = 1.14197 Nu = 0.448893 Eta = 0.289143 Pi = 0.055147
Component 8: Mode = 1453.09 Mu = 1452.82 Sigma = 3.01643 Nu = 0.272915 Eta = 0.067646 Pi = 0.030523
Data error scale factor = 1.619126

## Sheet: Tianshui sands
Tianshui sands from Liu et al., 2015
WS 1 (randomly selected)
No of components = 6; Log Likelihood = 183.133728; Log Posterior = 158.186236
Component 1: Mode = 225.965 Mu = 225.965 Sigma = 5.13779 Nu = 1.06677 Eta = 1.06677 Pi = 0.16975
Component 2: Mode = 441.377 Mu = 450.105 Sigma = 4.52889 Nu = 0.696077 Eta = 4.83614 Pi = 0.625387
Component 3: Mode = 933.814 Mu = 933.732 Sigma = 3.5912 Nu = 0.449044 Eta = 0.403218 Pi = 0.032866
Component 4: Mode = 1396.25 Mu = 1396.25 Sigma = 6.7841 Nu = 0.539283 Eta = 0.539283 Pi = 0.009099
Component 5: Mode = 1973.89 Mu = 1973.89 Sigma = 2.6501 Nu = 0.158129 Eta = 0.158129 Pi = 0.121699
Component 6: Mode = 2431.04 Mu = 2442.94 Sigma = 9.91423 Nu = 0.796243 Eta = 3.43046 Pi = 0.041197
Data error scale factor = 1.910546
WS 8 (randomly selected)
No of components = 7; Log Likelihood = 253.547547; Log Posterior = 229.674395
Component 1: Mode = 220.622 Mu = 220.622 Sigma = 21.3521 Nu = 0.885037 Eta = 0.885037 Pi = 0.101175
Component 2: Mode = 393.308 Mu = 391.012 Sigma = 9.637 Nu = 0.702233 Eta = 0.239229 Pi = 0.089784
Component 3: Mode = 436.802 Mu = 438.644 Sigma = 3.1437 Nu = 0.72609 Eta = 1.96777 Pi = 0.608205
Component 4: Mode = 907.939 Mu = 907.939 Sigma = 3.70964 Nu = 0.21856 Eta = 0.21856 Pi = 0.030671
Component 5: Mode = 1092.99 Mu = 1092.99 Sigma = 9.83936 Nu = 0.407598 Eta = 0.407598 Pi = 0.049425
Component 6: Mode = 1718.26 Mu = 1718.26 Sigma = 6.07924 Nu = 0.320712 Eta = 0.320712 Pi = 0.055221
Component 7: Mode = 2457.69 Mu = 2457.69 Sigma = 4.70158 Nu = 0.922774 Eta = 0.922774 Pi = 0.065518
Data error scale factor = 1.726102
WS 15 (randomly selected)
No of components = 9; Log Likelihood = 170.001976; Log Posterior = 145.267852
Component 1: Mode = 233.399 Mu = 233.25 Sigma = 3.58489 Nu = 0.513563 Eta = 0.430671 Pi = 0.126701
Component 2: Mode = 281.334 Mu = 281.334 Sigma = 3.91469 Nu = 0.274264 Eta = 0.274264 Pi = 0.102817
Component 3: Mode = 463.976 Mu = 463.729 Sigma = 3.46645 Nu = 0.463837 Eta = 0.320806 Pi = 0.279859
Component 4: Mode = 893.979 Mu = 893.979 Sigma = 42.8323 Nu = 0.693644 Eta = 0.693644 Pi = 0.119673
Component 5: Mode = 1423.32 Mu = 1423.32 Sigma = 3.8701 Nu = 0.985378 Eta = 0.985378 Pi = 0.021803
Component 6: Mode = 1861.91 Mu = 1865.34 Sigma = 3.65279 Nu = 0.812062 Eta = 2.87259 Pi = 0.14655
Component 7: Mode = 2181.51 Mu = 2181.51 Sigma = 13.725 Nu = 0.196003 Eta = 0.196003 Pi = 0.043433
Component 8: Mode = 2489.32 Mu = 2489.32 Sigma = 41.7332 Nu = 0.587297 Eta = 0.587297 Pi = 0.148419
Component 9: Mode = 2560.79 Mu = 2559.26 Sigma = 10.381 Nu = 0.63536 Eta = 0.342796 Pi = 0.010744
Data error scale factor = 1.836821
WS 23 (randomly selected)
No of components = 6; Log Likelihood = 409.242095; Log Posterior = 382.669663
Component 1: Mode = 218.04 Mu = 218.04 Sigma = 1.10169 Nu = 0.815728 Eta = 0.815728 Pi = 0.737523
Component 2: Mode = 430.598 Mu = 430.461 Sigma = 7.50316 Nu = 0.269717 Eta = 0.231034 Pi = 0.086093
Component 3: Mode = 825.729 Mu = 825.729 Sigma = 59.927 Nu = 0.869905 Eta = 0.869905 Pi = 0.11435
Component 4: Mode = 1872.94 Mu = 1889.82 Sigma = 15.3565 Nu = 0.533 Eta = 2.7559 Pi = 0.043918
Component 5: Mode = 2569.76 Mu = 2569.76 Sigma = 4.75751 Nu = 0.166 Eta = 0.166 Pi = 0.013566
Component 6: Mode = 3054.27 Mu = 3054.24 Sigma = 2.10708 Nu = 0.423409 Eta = 0.39216 Pi = 0.004549
Data error scale factor = 1.642767
YD 8 (randomly selected)
No of components = 2; Log Likelihood = 600.434140; Log Posterior = 587.889240
Component 1: Mode = 474.034 Mu = 473.997 Sigma = 0.548791 Nu = 0.440286 Eta = 0.305095 Pi = 0.979962
Component 2: Mode = 2377.17 Mu = 2377.17 Sigma = 0.66727 Nu = 0.384894 Eta = 0.384894 Pi = 0.020038
Data error scale factor = 1.182430
YDE (randomly selected)
No of components = 12; Log Likelihood = 231.890910; Log Posterior = 195.898658
Component 1: Mode = 226.01 Mu = 226.01 Sigma = 3.93603 Nu = 0.822841 Eta = 0.822841 Pi = 0.160403
Component 2: Mode = 283.34 Mu = 283.34 Sigma = 7.82185 Nu = 0.651951 Eta = 0.651951 Pi = 0.100835
Component 3: Mode = 429.789 Mu = 429.789 Sigma = 1.59633 Nu = 0.324761 Eta = 0.324761 Pi = 0.188752
Component 4: Mode = 485.691 Mu = 485.691 Sigma = 2.40135 Nu = 1.31011 Eta = 1.31011 Pi = 0.035709
Component 5: Mode = 807.226 Mu = 807.226 Sigma = 3.30828 Nu = 0.203201 Eta = 0.203201 Pi = 0.092888
Component 6: Mode = 888.947 Mu = 888.947 Sigma = 1.30454 Nu = 0.758758 Eta = 0.758758 Pi = 0.217124
Component 7: Mode = 1582.1 Mu = 1582.08 Sigma = 2.07351 Nu = 0.667374 Eta = 0.653403 Pi = 0.032428
Component 8: Mode = 1814.28 Mu = 1814.28 Sigma = 2.76975 Nu = 0.498518 Eta = 0.498518 Pi = 0.043169
Component 9: Mode = 1819.52 Mu = 2191.32 Sigma = 130.78 Nu = 0.988544 Eta = 7.7284 Pi = 0.100896
Component 10: Mode = 2252.71 Mu = 2252.71 Sigma = 4.99858 Nu = 0.204258 Eta = 0.204258 Pi = 0.000134
Component 11: Mode = 2406.23 Mu = 2415.2 Sigma = 4.68032 Nu = 0.333364 Eta = 3.90117 Pi = 0.001407
Component 12: Mode = 2515.17 Mu = 2515.17 Sigma = 2.6707 Nu = 2.01923 Eta = 2.01923 Pi = 0.026255
Data error scale factor = 1.817494

## Sheet: intergrated groups
The original data of individual samples can be gotten according to reference guides in the Figures DR2-5
intergrated Qin'an-Yawan silts (YW1, YW6, QA3, QA5)
No of components = 12, Log Likelihood = 436.508246, Log Posterior = 400.989702
Component 1: : Mode = 238.701 Mu = 238.701 Sigma = 10.5381 Nu = 0.447377 Eta = 0.447377 Pi = 0.130769
Component 2: : Mode = 280.852 Mu = 280.852 Sigma = 16.1454 Nu = 0.849143 Eta = 0.849143 Pi = 0.157065
Component 3: : Mode = 440.016 Mu = 440.016 Sigma = 40.883 Nu = 0.953281 Eta = 0.953281 Pi = 0.243389
Component 4: : Mode = 455.776 Mu = 455.776 Sigma = 83.7094 Nu = 1.67829 Eta = 1.67829 Pi = 0.050449
Component 5: : Mode = 778.521 Mu = 778.521 Sigma = 130.392 Nu = 1.48406 Eta = 1.48406 Pi = 0.137818
Component 6: : Mode = 1174.08 Mu = 1174.08 Sigma = 61.2715 Nu = 0.709971 Eta = 0.709971 Pi = 0.039098
Component 7: : Mode = 1519.58 Mu = 1519.58 Sigma = 73.0019 Nu = 0.580757 Eta = 0.580757 Pi = 0.065589
Component 8: : Mode = 1838.94 Mu = 1852.29 Sigma = 34.8176 Nu = 0.623314 Eta = 1.41143 Pi = 0.073543
Component 9: : Mode = 2081.05 Mu = 2081.05 Sigma = 13.9112 Nu = 0.535107 Eta = 0.535107 Pi = 0.030174
Component 10: : Mode = 2462.49 Mu = 2462.49 Sigma = 9.31626 Nu = 0.522593 Eta = 0.522593 Pi = 0.028172
Component 11: : Mode = 2571.71 Mu = 2571.71 Sigma = 60.5005 Nu = 0.352914 Eta = 0.352914 Pi = 0.032814
Component 12: : Mode = 3215.68 Mu = 3301.15 Sigma = 48.5852 Nu = 0.48063 Eta = 3.97224 Pi = 0.011121
Data error scale factor = 1.443750
Wushan silts (WS2, WS7, WS9, WS21)
No of components = 11; Log Likelihood = 566.098541; Log Posterior = 532.669470
Component 1: Mode = 28.2677 Mu = 28.2677 Sigma = 9.99741 Nu = 0.508058 Eta = 0.508058 Pi = 0.013925
Component 2: Mode = 243.517 Mu = 242.171 Sigma = 9.97614 Nu = 0.780189 Eta = 0.510093 Pi = 0.158425
Component 3: Mode = 285.12 Mu = 285.12 Sigma = 60.2471 Nu = 0.677107 Eta = 0.677107 Pi = 0.128054
Component 4: Mode = 443.754 Mu = 443.754 Sigma = 4.25548 Nu = 0.416163 Eta = 0.416163 Pi = 0.221227
Component 5: Mode = 575.36 Mu = 575.36 Sigma = 5.52266 Nu = 0.59694 Eta = 0.59694 Pi = 0.030841
Component 6: Mode = 803.352 Mu = 803.352 Sigma = 8.22764 Nu = 1.44945 Eta = 1.44945 Pi = 0.089724
Component 7: Mode = 922.52 Mu = 922.52 Sigma = 12.9999 Nu = 0.766528 Eta = 0.766528 Pi = 0.1041
Component 8: Mode = 1166.28 Mu = 1166.28 Sigma = 39.5788 Nu = 0.658539 Eta = 0.658539 Pi = 0.071363
Component 9: Mode = 1834.81 Mu = 1943.07 Sigma = 83.3146 Nu = 0.784159 Eta = 3.63291 Pi = 0.069108
Component 10: Mode = 2284.81 Mu = 2483.62 Sigma = 235.59 Nu = 0.611989 Eta = 2.35785 Pi = 0.100374
Component 11: Mode = 2565.18 Mu = 2565.18 Sigma = 33.728 Nu = 0.392425 Eta = 0.392425 Pi = 0.012859
Data error scale factor = 1.959957
Wushan & Linxia & YD sands (WS1, WS8, WS15, WS23, YD8, YDE, LC7, LC5, WGS13, WGS14, WGS15, WGS16)
No of components = 10, Log Likelihood = 1495.265207, Log Posterior = 1450.629669
Component 1: : Mode = 218.811 Mu = 218.811 Sigma = 5.19368 Nu = 1.26773 Eta = 1.26773 Pi = 0.155401
Component 2: : Mode = 264.137 Mu = 264.137 Sigma = 17.8507 Nu = 1.54611 Eta = 1.54611 Pi = 0.077426
Component 3: : Mode = 458.627 Mu = 469.237 Sigma = 20.0988 Nu = 1.73179 Eta = 3.09292 Pi = 0.423682
Component 4: : Mode = 741.778 Mu = 740.909 Sigma = 7.13811 Nu = 0.486542 Eta = 0.242557 Pi = 0.009805
Component 5: : Mode = 894.346 Mu = 894.346 Sigma = 39.2464 Nu = 0.593052 Eta = 0.593052 Pi = 0.085802
Component 6: : Mode = 1901.33 Mu = 1932.92 Sigma = 76.2028 Nu = 0.72365 Eta = 1.59544 Pi = 0.156132
Component 7: : Mode = 2528.52 Mu = 2570.96 Sigma = 7.20202 Nu = 0.508595 Eta = 12.3404 Pi = 0.07672
Component 8: : Mode = 2702.92 Mu = 2702.92 Sigma = 5.81939 Nu = 2.16612 Eta = 2.16612 Pi = 0.005669
Component 9: : Mode = 2890.16 Mu = 2890.16 Sigma = 8.6053 Nu = 0.747113 Eta = 0.747113 Pi = 0.006356
Component 10: : Mode = 3250.73 Mu = 3250.73 Sigma = 3.22002 Nu = 0.268728 Eta = 0.268728 Pi = 0.003007
Data error scale factor = 1.718701
West Qinling (TP, 4X, SG, T078, Kach1, BSG, D607, DCT SMZ, HJG, BS)
No of components = 8, Log Likelihood = 1170.379712, Log Posterior = 1134.563590
Component 1: : Mode = 222.482 Mu = 222.482 Sigma = 13.4376 Nu = 3.03636 Eta = 3.03636 Pi = 0.117264
Component 2: : Mode = 282.614 Mu = 282.614 Sigma = 18.7079 Nu = 1.74706 Eta = 1.74706 Pi = 0.097403
Component 3: : Mode = 454.098 Mu = 454.098 Sigma = 16.7561 Nu = 0.945473 Eta = 0.945473 Pi = 0.382201
Component 4: : Mode = 868.542 Mu = 868.542 Sigma = 95.8718 Nu = 0.978339 Eta = 0.978339 Pi = 0.167754
Component 5: : Mode = 1464.35 Mu = 1464.35 Sigma = 109.109 Nu = 0.753488 Eta = 0.753488 Pi = 0.026484
Component 6: : Mode = 1858.78 Mu = 1858.78 Sigma = 50.7034 Nu = 0.825114 Eta = 0.825114 Pi = 0.114233
Component 7: : Mode = 2471.57 Mu = 2471.57 Sigma = 81.5133 Nu = 0.698773 Eta = 0.698773 Pi = 0.088605
Component 8: : Mode = 2693.37 Mu = 2693.37 Sigma = 21.8712 Nu = 0.085844 Eta = 0.085844 Pi = 0.006056
Data error scale factor = 1.999838
upper Yellow River (UYR1, UYR2, UYR3, UYR4, UYR5, UYR6)
No of components = 5, Log Likelihood = 1655.939215, Log Posterior = 1636.475553
Component 1: : Mode = 252.754 Mu = 252.754 Sigma = 30.178 Nu = 1.21639 Eta = 1.21639 Pi = 0.301813
Component 2: : Mode = 440.9 Mu = 440.9 Sigma = 20.7867 Nu = 0.94279 Eta = 0.94279 Pi = 0.190929
Component 3: : Mode = 832.406 Mu = 832.406 Sigma = 106.164 Nu = 0.858963 Eta = 0.858963 Pi = 0.179331
Component 4: : Mode = 1834.52 Mu = 1834.52 Sigma = 51.8161 Nu = 0.517118 Eta = 0.517118 Pi = 0.22305
Component 5: : Mode = 2462.91 Mu = 2462.91 Sigma = 53.2294 Nu = 0.393282 Eta = 0.393282 Pi = 0.104876
Data error scale factor = 1.943308
middle Yellow River (MYR7, MYR-L, MYR9, MYR10, MYR11)
No of components = 6, Log Likelihood = 1007.980632, Log Posterior = 975.375511
Component 1: : Mode = 266.967 Mu = 266.967 Sigma = 33.2375 Nu = 1.72174 Eta = 1.72174 Pi = 0.210779
Component 2: : Mode = 447.359 Mu = 447.359 Sigma = 22.4703 Nu = 0.84185 Eta = 0.84185 Pi = 0.328109
Component 3: : Mode = 871.879 Mu = 821.642 Sigma = 137.695 Nu = 1.93932 Eta = 1.11109 Pi = 0.164438
Component 4: : Mode = 1830.06 Mu = 1817.64 Sigma = 153.065 Nu = 1.08753 Eta = 0.915551 Pi = 0.2258
Component 5: : Mode = 2321.13 Mu = 2321.13 Sigma = 44.712 Nu = 0.581209 Eta = 0.581209 Pi = 0.025461
Component 6: : Mode = 2481.15 Mu = 2481.15 Sigma = 31.226 Nu = 0.75001 Eta = 0.75001 Pi = 0.045413
Data error scale factor = 0.772110
Qilian (QL1, QL2, QL28, RSH01, QF02, QF04, QF15, HH01)
No of components = 7, Log Likelihood = 614.260942, Log Posterior = 583.289479
Component 1: : Mode = 268.382 Mu = 268.382 Sigma = 25.6648 Nu = 1.14169 Eta = 1.14169 Pi = 0.116525
Component 2: : Mode = 395.928 Mu = 395.928 Sigma = 40.5059 Nu = 1.3549 Eta = 1.3549 Pi = 0.15565
Component 3: : Mode = 449.078 Mu = 449.078 Sigma = 13.327 Nu = 0.721737 Eta = 0.721737 Pi = 0.249579
Component 4: : Mode = 766.227 Mu = 766.227 Sigma = 125.071 Nu = 0.997686 Eta = 0.997686 Pi = 0.237892
Component 5: : Mode = 1445.14 Mu = 1445.14 Sigma = 219.839 Nu = 1.23569 Eta = 1.23569 Pi = 0.051428
Component 6: : Mode = 1829.71 Mu = 1829.71 Sigma = 110.086 Nu = 1.10199 Eta = 1.10199 Pi = 0.14237
Component 7: : Mode = 2495.41 Mu = 2501.62 Sigma = 101.777 Nu = 1.14615 Eta = 1.28021 Pi = 0.046556
Data error scale factor = 0.721641
Qaidam dayland (QD.4.18, QD.4.17, QD.4.27, QD.10QBAP04, QD.MT226, QD.MT97)
No of components = 9, Log Likelihood = 1177.543652, Log Posterior = 1131.858798
Component 1: : Mode = 103.813 Mu = 103.095 Sigma = 2.94459 Nu = 0.778268 Eta = 0.303106 Pi = 0.023881
Component 2: : Mode = 260.106 Mu = 260.106 Sigma = 11.7901 Nu = 0.740965 Eta = 0.740965 Pi = 0.137868
Component 3: : Mode = 449.057 Mu = 468.877 Sigma = 5.39995 Nu = 1.20516 Eta = 10.4976 Pi = 0.393552
Component 4: : Mode = 515.443 Mu = 515.45 Sigma = 7.41159 Nu = 0.356029 Eta = 0.358051 Pi = 0.026972
Component 5: : Mode = 616.97 Mu = 616.97 Sigma = 5.082 Nu = 0.720982 Eta = 0.720982 Pi = 0.011985
Component 6: : Mode = 781.869 Mu = 781.869 Sigma = 10.1268 Nu = 0.550444 Eta = 0.550444 Pi = 0.057245
Component 7: : Mode = 990.986 Mu = 990.986 Sigma = 95.9871 Nu = 1.60036 Eta = 1.60036 Pi = 0.149679
Component 8: : Mode = 1727.43 Mu = 1727.43 Sigma = 349.849 Nu = 1.82378 Eta = 1.82378 Pi = 0.149793
Component 9: : Mode = 2476.57 Mu = 2476.57 Sigma = 47.3905 Nu = 1.95482 Eta = 1.95482 Pi = 0.049025
Data error scale factor = 1.110912
Qaidam Basin (HT-160611-01, HT-160611-02, HT-2QUA416, HT-2QUA144, 2DH-5484, 2DH-4580, NQ-EBLN, NQ-EE1, NQ-ED1, HTG-SZG1, HTG-SZG4, HTG-CSL4, HTG-N, STB3, GS-N)
No of components = 5, Log Likelihood = 2357.342024, Log Posterior = 2328.017042
Component 1: : Mode = 244.551 Mu = 244.551 Sigma = 17.3402 Nu = 2.25909 Eta = 2.25909 Pi = 0.286987
Component 2: : Mode = 423.117 Mu = 423.023 Sigma = 23.575 Nu = 1.70813 Eta = 1.69854 Pi = 0.467755
Component 3: : Mode = 889.823 Mu = 889.823 Sigma = 45.9048 Nu = 0.597765 Eta = 0.597765 Pi = 0.08802
Component 4: : Mode = 1848.52 Mu = 1848.52 Sigma = 113.313 Nu = 0.726568 Eta = 0.726568 Pi = 0.107313
Component 5: : Mode = 2457.43 Mu = 2694.19 Sigma = 83.8639 Nu = 1.01624 Eta = 7.76132 Pi = 0.049924
Data error scale factor = 1.344665
Jiuquan Basin (FZ1, FZ2, FZ3, FZ4, FZ5, FZ7)
No of components = 9; Log Likelihood = 1301.084911; Log Posterior = 1267.946200
Component 1: Mode = 269.048 Mu = 268.17 Sigma = 5.56393 Nu = 0.79158 Eta = 0.477109 Pi = 0.545062
Component 2: Mode = 425.469 Mu = 425.469 Sigma = 6.2556 Nu = 1.14944 Eta = 1.14944 Pi = 0.125565
Component 3: Mode = 476.058 Mu = 476.058 Sigma = 10.0396 Nu = 1.03878 Eta = 1.03878 Pi = 0.063979
Component 4: Mode = 771.72 Mu = 784.212 Sigma = 14.3019 Nu = 0.633793 Eta = 2.45313 Pi = 0.010891
Component 5: Mode = 1037.26 Mu = 1034.55 Sigma = 33.6775 Nu = 0.3265 Eta = 0.155553 Pi = 0.002602
Component 6: Mode = 1830.55 Mu = 1837.93 Sigma = 12.9941 Nu = 0.36217 Eta = 1.45632 Pi = 0.12231
Component 7: Mode = 1954.16 Mu = 1954.16 Sigma = 3.66153 Nu = 0.35486 Eta = 0.35486 Pi = 0.046751
Component 8: Mode = 2393.4 Mu = 2404.46 Sigma = 28.0786 Nu = 1.60091 Eta = 2.58123 Pi = 0.018886
Component 9: Mode = 2469.43 Mu = 2469.43 Sigma = 27.4264 Nu = 0.361721 Eta = 0.361721 Pi = 0.063954
Data error scale factor = 1.744048
Tengger & Badanjilin Deserts (BJ.24, TGD.13DUNE06, TGD.13DUNE05, TGD.13DUNE03, TGD.13DUNE02, TGD.TG15, TGD.TG25, TGD.TG65, TGD.TG12, TGD.TG53Z, TGD.TG50, TGD.TG40, TGD.TG53, TGD.TG56, TGD.TD1, TGD.TG05 )
No of components = 7, Log Likelihood = 2145.317690, Log Posterior = 2103.153333
Component 1: : Mode = 277.634 Mu = 271.436 Sigma = 18.9126 Nu = 1.92791 Eta = 1.17728 Pi = 0.44854
Component 2: : Mode = 442.62 Mu = 442.62 Sigma = 30.1204 Nu = 1.0155 Eta = 1.0155 Pi = 0.228211
Component 3: : Mode = 923.661 Mu = 926.865 Sigma = 116.94 Nu = 1.29455 Eta = 1.35598 Pi = 0.074524
Component 4: : Mode = 1418.84 Mu = 1415.23 Sigma = 16.2567 Nu = 2.18877 Eta = 1.64373 Pi = 0.022591
Component 5: : Mode = 1826.89 Mu = 1815.34 Sigma = 85.3521 Nu = 0.973108 Eta = 0.695201 Pi = 0.166041
Component 6: : Mode = 2489.74 Mu = 2573.03 Sigma = 9.80931 Nu = 1.09053 Eta = 22.2336 Pi = 0.059066
Component 7: : Mode = 3542.07 Mu = 3542.07 Sigma = 63.1663 Nu = 1.13049 Eta = 1.13049 Pi = 0.001026
Data error scale factor = 1.866027
Mu Us Desert (MD1, MD2, MD3, MD4, MD5, MD6, MD7, MD8, MD9, MD10, MD51, MD50, MD30, MD43, MD40, MD24, MD36, MD32, MD35, MD39, MD09,)
No of components = 7, Log Likelihood = 3069.681131, Log Posterior = 3037.903755
Component 1: : Mode = 275.271 Mu = 275.271 Sigma = 21.2121 Nu = 0.851057 Eta = 0.851057 Pi = 0.28501
Component 2: : Mode = 447.303 Mu = 447.303 Sigma = 27.7819 Nu = 0.860256 Eta = 0.860256 Pi = 0.144874
Component 3: : Mode = 900.708 Mu = 900.708 Sigma = 88.4452 Nu = 1.02104 Eta = 1.02104 Pi = 0.050503
Component 4: : Mode = 1590.88 Mu = 1704.79 Sigma = 249.864 Nu = 1.58171 Eta = 2.71987 Pi = 0.015631
Component 5: : Mode = 1683.3 Mu = 1683.3 Sigma = 16.4122 Nu = 1.29637 Eta = 1.29637 Pi = 0.024715
Component 6: : Mode = 1925.95 Mu = 1925.95 Sigma = 66.1523 Nu = 0.703612 Eta = 0.703612 Pi = 0.237501
Component 7: : Mode = 2456.94 Mu = 2495.69 Sigma = 78.8107 Nu = 0.873535 Eta = 1.947 Pi = 0.241766
Data error scale factor = 0.551874
loess on CLP (LC-L15, HM-L1, HM-L9, HM-L15, XN-L1CGB, XN-L1, XF-L1X, XF-L1C, XF-L5, JB-L3, JB-L8, JB-L16, JB-L18, CX-L1, BG-L1S, BG-L1B, BG-L2, LT-L1, LT-L2, LT-L3, LT-L4, LT-L5)
No of components = 11; Log Likelihood = 5775.602892; Log Posterior = 5729.059597
Component 1: Mode = 61.262 Mu = 61.262 Sigma = 21.208 Nu = 0.834748 Eta = 0.834748 Pi = 0.003218
Component 2: Mode = 258.256 Mu = 258.256 Sigma = 26.8239 Nu = 0.876965 Eta = 0.876965 Pi = 0.075573
Component 3: Mode = 274.71 Mu = 274.71 Sigma = 35.7098 Nu = 1.16874 Eta = 1.16874 Pi = 0.175313
Component 4: Mode = 440.491 Mu = 440.491 Sigma = 33.0332 Nu = 1.35112 Eta = 1.35112 Pi = 0.296256
Component 5: Mode = 834.992 Mu = 834.992 Sigma = 134.356 Nu = 2.09211 Eta = 2.09211 Pi = 0.172482
Component 6: Mode = 1449.39 Mu = 1449.39 Sigma = 122.086 Nu = 1.03886 Eta = 1.03886 Pi = 0.059469
Component 7: Mode = 1773.26 Mu = 1773.26 Sigma = 52.2578 Nu = 1.15793 Eta = 1.15793 Pi = 0.046351
Component 8: Mode = 1873.12 Mu = 1873.12 Sigma = 12.5946 Nu = 0.642357 Eta = 0.642357 Pi = 0.040272
Component 9: Mode = 2005.48 Mu = 2005.48 Sigma = 38.5932 Nu = 1.74979 Eta = 1.74979 Pi = 0.035072
Component 10: Mode = 2269.69 Mu = 2477.07 Sigma = 403.008 Nu = 1.63123 Eta = 2.9343 Pi = 0.053148
Component 11: Mode = 2498.76 Mu = 2506.88 Sigma = 13.3041 Nu = 0.529291 Eta = 1.75923 Pi = 0.042844
Data error scale factor = 1.906671
Red Clay on CLP (CN-3Ma, CN-4Ma, CN-5.5Ma, LT-3Ma, LT-5.5Ma, LT-6Ma, LT-7Ma, BD-3.5Ma, BD-5.24Ma, BD-5.75Ma, BD-6.19Ma, BD-6.56Ma, BD-6.91Ma, BD-7.16Ma, DW-4.46Ma, DW-5.26Ma, DW-5.47Ma, DW-5.81Ma, LC-RC, XF-RCM, XF-RCB)
No of components = 10; Log Likelihood = 2350.165270; Log Posterior = 2300.836747
Component 1: Mode = 277.618 Mu = 277.618 Sigma = 26.1748 Nu = 0.958147 Eta = 0.958147 Pi = 0.218042
Component 2: Mode = 446.573 Mu = 472.528 Sigma = 28.6127 Nu = 1.58051 Eta = 3.92658 Pi = 0.247994
Component 3: Mode = 572.392 Mu = 572.392 Sigma = 65.0309 Nu = 1.58748 Eta = 1.58748 Pi = 0.051335
Component 4: Mode = 800.974 Mu = 840.22 Sigma = 56.5801 Nu = 1.2084 Eta = 2.85608 Pi = 0.076239
Component 5: Mode = 953.299 Mu = 968.345 Sigma = 23.2901 Nu = 0.578929 Eta = 1.89949 Pi = 0.068827
Component 6: Mode = 1114.81 Mu = 1114.81 Sigma = 25.5357 Nu = 0.640691 Eta = 0.640691 Pi = 0.023511
Component 7: Mode = 1468.69 Mu = 1468.69 Sigma = 189.251 Nu = 1.89077 Eta = 1.89077 Pi = 0.106234
Component 8: Mode = 1872.95 Mu = 1872.95 Sigma = 89.8893 Nu = 0.650309 Eta = 0.650309 Pi = 0.12221
Component 9: Mode = 2399.4 Mu = 2548.77 Sigma = 177.197 Nu = 1.21071 Eta = 3.2318 Pi = 0.041467
Component 10: Mode = 2494.23 Mu = 2494.23 Sigma = 57.2578 Nu = 1.52028 Eta = 1.52028 Pi = 0.044141
Data error scale factor = 1.281997
Red Clay in Altun (CHG-10.2Ma, CHG-6.4Ma, CHG-3.4Ma)
No of components = 7, Log Likelihood = 278.372783, Log Posterior = 251.567952
Component 1: : Mode = 275.07 Mu = 272.419 Sigma = 13.8975 Nu = 0.795049 Eta = 0.417362 Pi = 0.114022
Component 2: : Mode = 466.677 Mu = 466.677 Sigma = 39.3308 Nu = 1.09238 Eta = 1.09238 Pi = 0.430505
Component 3: : Mode = 909.185 Mu = 909.185 Sigma = 91.6572 Nu = 0.979034 Eta = 0.979034 Pi = 0.175814
Component 4: : Mode = 1412.68 Mu = 1412.68 Sigma = 7.27119 Nu = 0.524171 Eta = 0.524171 Pi = 0.064868
Component 5: : Mode = 1882.38 Mu = 1882.38 Sigma = 62.5732 Nu = 0.522455 Eta = 0.522455 Pi = 0.141807
Component 6: : Mode = 1953.69 Mu = 1970.58 Sigma = 18.8672 Nu = 0.830029 Eta = 2.79884 Pi = 0.016658
Component 7: : Mode = 2417.23 Mu = 2417.23 Sigma = 100.626 Nu = 0.899209 Eta = 0.899209 Pi = 0.056327
Data error scale factor = 1.858600
Altai-Gobi (Tb57, Tb58, Tb60, GA01, GA02, YG02, BS2, BS3)
No of components = 4, Log Likelihood = 1677.318987, Log Posterior = 1651.510141
Component 1: : Mode = 280.284 Mu = 280.284 Sigma = 23.9829 Nu = 1.16883 Eta = 1.16883 Pi = 0.385679
Component 2: : Mode = 405.537 Mu = 388.303 Sigma = 25.7169 Nu = 2.75884 Eta = 1.17891 Pi = 0.489718
Component 3: : Mode = 930.743 Mu = 930.743 Sigma = 144.988 Nu = 1.26459 Eta = 1.26459 Pi = 0.047198
Component 4: : Mode = 1815.49 Mu = 1815.49 Sigma = 105.345 Nu = 0.388365 Eta = 0.388365 Pi = 0.077404
Data error scale factor = 1.727641
Tianshan (HTB1, MNS1, Tb01, Tb02, Tb50, Tb45, Tb48, Tb49, Tb52)
No of components = 7, Log Likelihood = 1340.687893, Log Posterior = 1316.389012
Component 1: : Mode = 155.1 Mu = 155.1 Sigma = 5.28616 Nu = 0.58711 Eta = 0.58711 Pi = 0.019601
Component 2: : Mode = 285.992 Mu = 281.221 Sigma = 14.1122 Nu = 1.31038 Eta = 0.617693 Pi = 0.40859
Component 3: : Mode = 429.989 Mu = 429.989 Sigma = 16.4195 Nu = 1.26082 Eta = 1.26082 Pi = 0.290625
Component 4: : Mode = 803.843 Mu = 790.415 Sigma = 85.0944 Nu = 0.932286 Eta = 0.611778 Pi = 0.189808
Component 5: : Mode = 1557.46 Mu = 1556.28 Sigma = 20.8996 Nu = 0.223671 Eta = 0.091666 Pi = 0.001986
Component 6: : Mode = 1843.62 Mu = 1843.62 Sigma = 94.8362 Nu = 0.512604 Eta = 0.512604 Pi = 0.038888
Component 7: : Mode = 2452.3 Mu = 2452.3 Sigma = 36.5286 Nu = 0.329787 Eta = 0.329787 Pi = 0.050501
Data error scale factor = 1.993594
Pamir & West Kunlun (WK1344, PA.1359, PA.1357, PA.1355, Tb43, Tb41, Tb38, Tb35, Tb19, Tb12, Tb15, Tb09)
No of components = 8, Log Likelihood = 2265.155542, Log Posterior = 2221.671827
Component 1: : Mode = 15.141 Mu = 27.597 Sigma = 6.92177 Nu = 1.94144 Eta = 7.09716 Pi = 0.010857
Component 2: : Mode = 106.776 Mu = 106.776 Sigma = 3.52388 Nu = 0.4225 Eta = 0.4225 Pi = 0.083416
Component 3: : Mode = 219.036 Mu = 215.86 Sigma = 12.5062 Nu = 1.56414 Eta = 1.005573 Pi = 0.253158
Component 4: : Mode = 304.067 Mu = 304.067 Sigma = 28.1705 Nu = 1.46195 Eta = 1.26082 Pi = 0.091841
Component 5: : Mode = 443.303 Mu = 443.303 Sigma = 37.3629 Nu = 1.4206 Eta = 1.4206 Pi = 0.286202
Component 6: : Mode = 745.612 Mu = 697.669 Sigma = 170.872 Nu = 1.39968 Eta = 1.4026 Pi = 0.179346
Component 7: : Mode = 1850.04 Mu = 1838.2 Sigma = 42.7171 Nu = 1.08499 Eta = 0.52804 Pi = 0.043696
Component 8: : Mode = 2421.25 Mu = 2421.25 Sigma = 134.123 Nu = 0.793145 Eta = 0.793145 Pi = 0.051484
Data error scale factor = 0.640239
Gurbantunggut-Taklamakan-Kumtag Deserts (GD.TB62, GD.TB27, GD.TB22, GD.TB23, GD.TB05, GD.TB07, GD.TB11b, GD.TB21, GD.TB20, GD.TB29, GD.TB31, GD.TB39, KD.13COSMO09, KD.13COSMO07, KD.13DUNE07, KD.13DUNE09, KD.13YARD02, KD.13YARD01)
No of components = 7, Log Likelihood = 2288.420105, Log Posterior = 2252.018177
Component 1: : Mode = 105.883 Mu = 114.482 Sigma = 12.7063 Nu = 0.986579 Eta = 2.51785 Pi = 0.026806
Component 2: : Mode = 224.604 Mu = 224.604 Sigma = 14.8663 Nu = 1.46768 Eta = 1.46768 Pi = 0.071572
Component 3: : Mode = 284.832 Mu = 281.761 Sigma = 15.4552 Nu = 0.929896 Eta = 0.53067 Pi = 0.275892
Component 4: : Mode = 438.271 Mu = 434.057 Sigma = 35.0516 Nu = 1.7429 Eta = 1.46115 Pi = 0.382075
Component 5: : Mode = 826.758 Mu = 806.417 Sigma = 169.925 Nu = 1.49946 Eta = 1.22996 Pi = 0.136106
Component 6: : Mode = 1868.21 Mu = 1868.21 Sigma = 123.158 Nu = 0.85467 Eta = 0.85467 Pi = 0.083038
Component 7: : Mode = 2415.73 Mu = 2415.73 Sigma = 124.049 Nu = 1.14959 Eta = 1.14959 Pi = 0.024511
Data error scale factor = 0.500021
Junggar & North Tarim Basins (NT-P, NT-M, JG-N1, JG-N2)
No of components = 6; Log Likelihood = 724.845629; Log Posterior = 694.996589
Component 1: Mode = 164.956 Mu = 164.956 Sigma = 3.55204 Nu = 0.510763 Eta = 0.510763 Pi = 0.037888
Component 2: Mode = 291.543 Mu = 291.543 Sigma = 10.3961 Nu = 1.0223 Eta = 1.0223 Pi = 0.177217
Component 3: Mode = 331.385 Mu = 331.385 Sigma = 7.42522 Nu = 0.836788 Eta = 0.836788 Pi = 0.136152
Component 4: Mode = 423.83 Mu = 423.83 Sigma = 13.8403 Nu = 0.623129 Eta = 0.623129 Pi = 0.519122
Component 5: Mode = 882.822 Mu = 971.146 Sigma = 36.0417 Nu = 1.0425 Eta = 6.91866 Pi = 0.05141
Component 6: Mode = 2212.03 Mu = 2212.03 Sigma = 208.691 Nu = 1.2104 Eta = 1.2104 Pi = 0.078211
Data error scale factor = 1.773022
South Tarim Basin (ST1327, ST1324, ST1322, ST1319, ST1317, PMR01, PMR46, PMR33)
No of components = 10, Log Likelihood = 1123.968532, Log Posterior = 1082.341877
Component 1: : Mode = 15.5007 Mu = 17.1415 Sigma = 1.39442 Nu = 1.46766 Eta = 4.4888 Pi = 0.005294
Component 2: : Mode = 223.445 Mu = 223.445 Sigma = 3.00816 Nu = 0.606128 Eta = 0.606128 Pi = 0.114595
Component 3: : Mode = 281.368 Mu = 281.368 Sigma = 25.3686 Nu = 0.895663 Eta = 0.895663 Pi = 0.233393
Component 4: : Mode = 433.523 Mu = 433.523 Sigma = 2.65713 Nu = 0.479582 Eta = 0.479582 Pi = 0.20949
Component 5: : Mode = 493.561 Mu = 493.561 Sigma = 5.16145 Nu = 0.408876 Eta = 0.408876 Pi = 0.089153
Component 6: : Mode = 642.327 Mu = 651.413 Sigma = 5.35768 Nu = 1.24428 Eta = 5.46816 Pi = 0.065004
Component 7: : Mode = 809.366 Mu = 809.294 Sigma = 3.93762 Nu = 0.285625 Eta = 0.247194 Pi = 0.096469
Component 8: : Mode = 988.727 Mu = 993.827 Sigma = 3.29673 Nu = 0.7796 Eta = 4.17915 Pi = 0.063298
Component 9: : Mode = 1847.45 Mu = 1847.45 Sigma = 15.591 Nu = 0.278923 Eta = 0.278923 Pi = 0.05715
Component 10: : Mode = 2480.16 Mu = 2465.68 Sigma = 112.541 Nu = 1.3092 Eta = 1.02926 Pi = 0.066156
Data error scale factor = 1.998413
loess in Tarim (TL-Tb05)
No of components = 10, Log Likelihood = 120.278667, Log Posterior = 98.369571
Component 1: : Mode = 213.755 Mu = 216.876 Sigma = 13.9959 Nu = 0.702608 Eta = 1.16448 Pi = 0.025259
Component 2: : Mode = 276.074 Mu = 276.074 Sigma = 11.3432 Nu = 0.437642 Eta = 0.437642 Pi = 0.268132
Component 3: : Mode = 403.044 Mu = 403.044 Sigma = 20.2441 Nu = 0.825514 Eta = 0.825514 Pi = 0.220839
Component 4: : Mode = 428.845 Mu = 428.845 Sigma = 20.7151 Nu = 0.373558 Eta = 0.373558 Pi = 0.156242
Component 5: : Mode = 609.533 Mu = 606.555 Sigma = 24.5206 Nu = 0.659603 Eta = 0.418219 Pi = 0.150497
Component 6: : Mode = 783.377 Mu = 783.377 Sigma = 10.1005 Nu = 0.487036 Eta = 0.487036 Pi = 0.065092
Component 7: : Mode = 1234.72 Mu = 1234.59 Sigma = 18.5751 Nu = 0.055066 Eta = 0.029318 Pi = 0.01288
Component 8: : Mode = 1494.96 Mu = 1494.96 Sigma = 9.30168 Nu = 0.507445 Eta = 0.507445 Pi = 0.030568
Component 9: : Mode = 1987.4 Mu = 1993.44 Sigma = 96.5767 Nu = 0.901315 Eta = 1.0332 Pi = 0.051095
Component 10: : Mode = 2547.76 Mu = 2547.76 Sigma = 16.5897 Nu = 0.695599 Eta = 0.695599 Pi = 0.019396
Data error scale factor = 1.911377
